# Supplementary material for: Use, applicability and reliability of depth of hypnosis monitors in children - a survey among members of the European Society for Paediatric Anaesthesiology
Source: PubMed Central journal article supplement (PMC5902980; doi:10.1186/s12871-018-0503-y), 2018-04-16
Supplement: 12871_2018_503_MOESM1_ESM.pdf [file 12871_2018_503_MOESM1_ESM.pdf]

Dear colleague,

Thank you very much for agreeing to complete our survey on depth of anaesthesia monitoring in children. Your input is highly appreciated.

We estimate that it will take you approximately 7 minutes to complete the survey.

Sincerely,

Yuen M. Cheung  
Frank Weber

Paediatric Anaesthesia Unit  
Sophia Children's Hospital  
Erasmus University Medical Center  
Rotterdam  
The Netherlands

e-mail: [paediatric.anaesthesia.research@erasmusmc.nl](mailto:paediatric.anaesthesia.research@erasmusmc.nl)

## 1. What is your professional title

- Anaesthesiologist
- Anaesthesiologist in training (resident)
- Nurse Anaesthetist
- Physician Assistant
- Other (please specify)

## 2. What is your age?

- <30 years
- 30-40 years
- 41-50 years
- 51-60 years
- >60 years

## 3. In which country are you presently working?

## 4. In which hospital do you give your most anaesthetics?

### 5. How many years have you been practicing anaesthesiology?

|                   | <5                    | 5-10                  | 11-20                 | >20                   |
|-------------------|-----------------------|-----------------------|-----------------------|-----------------------|
| Years of practice | <input type="radio"/> | <input type="radio"/> | <input type="radio"/> | <input type="radio"/> |

### 6. How often do you give anaesthesia for the following different patient age groups?

|                               | Never                 | Occasionally          | Frequently            |
|-------------------------------|-----------------------|-----------------------|-----------------------|
| Pre-term neonates             | <input type="radio"/> | <input type="radio"/> | <input type="radio"/> |
| Full-term neonates to 1 month | <input type="radio"/> | <input type="radio"/> | <input type="radio"/> |
| Infants 1 month to 1 year     | <input type="radio"/> | <input type="radio"/> | <input type="radio"/> |
| 1-3 years                     | <input type="radio"/> | <input type="radio"/> | <input type="radio"/> |
| 4-6 years                     | <input type="radio"/> | <input type="radio"/> | <input type="radio"/> |
| 7-12 years                    | <input type="radio"/> | <input type="radio"/> | <input type="radio"/> |
| 13-18 years                   | <input type="radio"/> | <input type="radio"/> | <input type="radio"/> |
| Adult patients (> 18 years)   | <input type="radio"/> | <input type="radio"/> | <input type="radio"/> |

### 7. How often do you give anaesthesia for the following types of surgery in paediatric patients

|                 | Never                 | Occasionally          | Frequently            | (Almost) always       |
|-----------------|-----------------------|-----------------------|-----------------------|-----------------------|
| Minor surgery   | <input type="radio"/> | <input type="radio"/> | <input type="radio"/> | <input type="radio"/> |
| Major surgery   | <input type="radio"/> | <input type="radio"/> | <input type="radio"/> | <input type="radio"/> |
| Neurosurgery    | <input type="radio"/> | <input type="radio"/> | <input type="radio"/> | <input type="radio"/> |
| Cardiac surgery | <input type="radio"/> | <input type="radio"/> | <input type="radio"/> | <input type="radio"/> |

### 8. Which of the following depth of anaesthesia monitors are you familiar with? (you can choose multiple answers)

- Bispectral Index
- Entropy (Datex Ohmeda/ GE)
- aepEX
- cAAI
- AEP-monitor/ 2
- Cerebral State Index
- Narcotrend
- I don't know any depth of anaesthesia monitor
- Other (please specify)

**9. Which of the following depth of anaesthesia monitors are available at your institution? (you can choose multiple answers)**

- Bispectral Index
- Entropy (Datex Ohmeda/ GE)
- aepEX
- cAAI
- AEP-monitor/ 2
- Cerebral State Index
- Narcotrend
- There are no depth of anaesthesia monitors in my institution
- Other (please specify)

**10. Do you use depth of anaesthesia monitoring in pediatric patients?**

- Yes
- No

**11. What is/are your reason(s) for not using depth of anaesthesia monitoring in paediatric patients? (you can choose multiple answers)**

- It's too expensive
- It's unreliable
- It doesn't effect my method of anaesthesia
- No particular reason
- Other (please specify)

**12. How often do you use depth of anaesthesia monitoring in the following age groups?**

|                               | Never                 | Occasionally          | Frequently            | (Almost) always       |
|-------------------------------|-----------------------|-----------------------|-----------------------|-----------------------|
| Pre-term neonates             | <input type="radio"/> | <input type="radio"/> | <input type="radio"/> | <input type="radio"/> |
| Full-term neonates to 1 month | <input type="radio"/> | <input type="radio"/> | <input type="radio"/> | <input type="radio"/> |
| Infants > 1 month < 1 year    | <input type="radio"/> | <input type="radio"/> | <input type="radio"/> | <input type="radio"/> |
| 1-3 years                     | <input type="radio"/> | <input type="radio"/> | <input type="radio"/> | <input type="radio"/> |
| 4-6 years                     | <input type="radio"/> | <input type="radio"/> | <input type="radio"/> | <input type="radio"/> |
| 7-12 years                    | <input type="radio"/> | <input type="radio"/> | <input type="radio"/> | <input type="radio"/> |
| 13-18 years                   | <input type="radio"/> | <input type="radio"/> | <input type="radio"/> | <input type="radio"/> |
| Adult patients (> 18 years)   | <input type="radio"/> | <input type="radio"/> | <input type="radio"/> | <input type="radio"/> |

**13. For which of the following procedures do you use depth of anaesthesia monitoring? (you can choose multiple answers)**

- Minor surgery
- Procedural sedation
- Major surgery
- Cardiac surgery
- Neurosurgery
- Other (please specify)

**14. Please rank the following monitors in order from those most to least frequently used in your personal practice (you can drag and drop the options)**

|                      |                            |                                        |
|----------------------|----------------------------|----------------------------------------|
| <input type="text"/> | Bispectral Index           | <input type="checkbox"/> Not available |
| <input type="text"/> | Entropy (Datex Ohmeda/ GE) | <input type="checkbox"/> Not available |
| <input type="text"/> | aepEX                      | <input type="checkbox"/> Not available |
| <input type="text"/> | cAAI                       | <input type="checkbox"/> Not available |
| <input type="text"/> | AEP-monitor/ 2             | <input type="checkbox"/> Not available |
| <input type="text"/> | Cerebral State Index       | <input type="checkbox"/> Not available |
| <input type="text"/> | Narcotrend                 | <input type="checkbox"/> Not available |

**15. Please rank the following reasons for using depth of anaesthesia monitoring in order from the most to least important for you (you can drag and drop the options)**

|                      |                                                             |
|----------------------|-------------------------------------------------------------|
| <input type="text"/> | To enable use of less anaesthetic agents                    |
| <input type="text"/> | Prevention of intra-operative awareness                     |
| <input type="text"/> | Decrease time to awakening                                  |
| <input type="text"/> | Prevention of (possible) side effects of anaesthetic agents |

**16. Do you have any other reasons for using depth of anaesthesia monitoring?**

- Yes
- No

**17. What is/are your additional reason(s), in order of decreasing importance, for using depth of anaesthesia monitoring in paediatric patients?**

|          |                      |
|----------|----------------------|
| Reason 1 | <input type="text"/> |
| Reason 2 | <input type="text"/> |
| Reason 3 | <input type="text"/> |
| Reason 4 | <input type="text"/> |

**18. Which aspect of the index value do you think best indicates to the depth of anaesthesia?**

- The trend (i.e. decreasing trend or increasing trend)
- The exact values
- The trend and exact values (depends on the monitor)
- Other (please specify)

**19. How would you intervene if ONLY the trend of the index values is increasing?**

- Increase the hypnotics
- Increase analgesics
- Combination of hypnosis and analgesics
- Do nothing; I only intervene when also other variables change (e.g. resp rate, pulse, bp etc)
- Other (please specify)

## 20. How would you intervene if ONLY the exact value of the index values is too high?

- Increase the hypnotics
- Increase analgesics
- Combination of hypnosis and analgesics
- Do nothing; I only intervene when also other variables change (e.g. resp rate, pulse, bp etc)
- Other (please specify)

## 21. How would you intervene if the index value is increasing and too high?

- Increase the hypnotics
- Increase analgesics
- Combination of hypnosis and analgesics
- Do nothing; I only intervene when also other variables change (e.g. resp rate, pulse, bp etc)
- Other (please specify)

## 22. With which of the following anaesthetic drugs do you use depth of anaesthesia monitoring in paediatric patients?

|             | Never                 | Sometimes             | Regularly             | Always                | Not applicable        |
|-------------|-----------------------|-----------------------|-----------------------|-----------------------|-----------------------|
| propofol    | <input type="radio"/> | <input type="radio"/> | <input type="radio"/> | <input type="radio"/> | <input type="radio"/> |
| sevoflurane | <input type="radio"/> | <input type="radio"/> | <input type="radio"/> | <input type="radio"/> | <input type="radio"/> |
| desflurane  | <input type="radio"/> | <input type="radio"/> | <input type="radio"/> | <input type="radio"/> | <input type="radio"/> |
| isoflurane  | <input type="radio"/> | <input type="radio"/> | <input type="radio"/> | <input type="radio"/> | <input type="radio"/> |
| halothane   | <input type="radio"/> | <input type="radio"/> | <input type="radio"/> | <input type="radio"/> | <input type="radio"/> |

## 23. Do we need the following devices in paediatric anaesthesia?

|                                                | Completely disagree   | Disagree              | I don't know          | Agree                 | Completely agree      |
|------------------------------------------------|-----------------------|-----------------------|-----------------------|-----------------------|-----------------------|
| Separate analgesia monitor                     | <input type="radio"/> | <input type="radio"/> | <input type="radio"/> | <input type="radio"/> | <input type="radio"/> |
| Combined analgesia & depth of hypnosis monitor | <input type="radio"/> | <input type="radio"/> | <input type="radio"/> | <input type="radio"/> | <input type="radio"/> |

**24. Please rank the following requirements for your ideal depth of anaesthesia monitor in the order from those most (1) to least (6) important. (you can drag and drop the options)**

|                      |                                                      |
|----------------------|------------------------------------------------------|
| <input type="text"/> | Applicability in all age groups                      |
| <input type="text"/> | Low costs disposables                                |
| <input type="text"/> | Reliability for any (combination of) anesthetic drug |
| <input type="text"/> | Lightweight device                                   |
| <input type="text"/> | Raw EEG display                                      |
| <input type="text"/> | Advanced artefact rejection protocol                 |

This was our last question. We thank you for taking the time to fill in our survey.
